# Supplementary material for: Role of PTA in the prevention of Cu(amyloid-β) induced ROS formation and amyloid-β oligomerisation in the presence of Zn
Source: Royal Society of Chemistry journal article supplement (doi:10.1039/c9mt00011a), 2019-04-17
Supplement: c9mt00011a1.pdf [file c9mt00011a1.pdf]

## Supplementary information

# PTA keeps its ability to prevent Cu(Amyloid- $\beta$ ) induced ROS formation and Amyloid- $\beta$ oligomerisation in presence of Zn(II)

**Elena Atrián-Blasco,<sup>a,b</sup> Elena Cerrada,<sup>b</sup> Peter Faller,<sup>a,c</sup> Mariano Laguna,<sup>b</sup> and Christelle Hureau,<sup>\*a</sup>**

<sup>a</sup> LCC-CNRS, Université de Toulouse, CNRS, 31400 Toulouse, France.

E-mail: christelle-hureau@lcc-toulouse.fr

<sup>b</sup> Instituto de Síntesis Química y Catálisis Homogénea, Universidad de Zaragoza-CSIC, Pza. San Francisco s/n, 50009 Zaragoza, Spain.

<sup>c</sup> Biometals and Biological Chemistry, Institut de Chimie, UMR 7177, Université de Strasbourg, CNRS, Le Bel, 4 rue B. Pascal, 67081 Strasbourg, France.

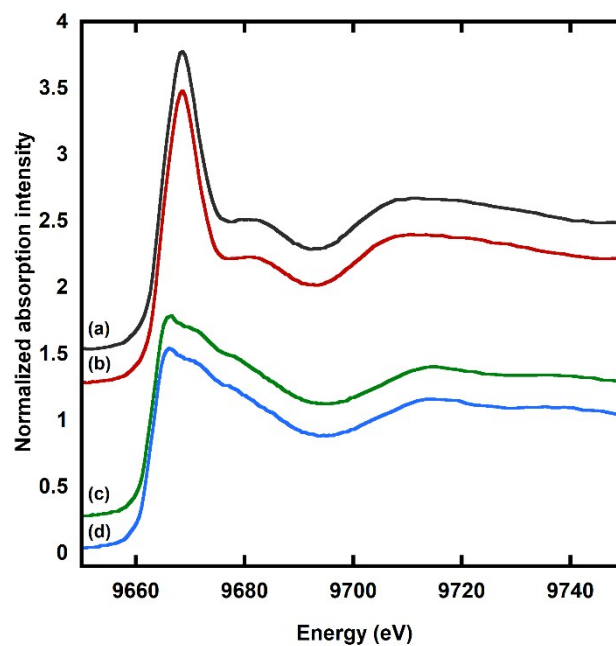

**Figure S1.** Zn K-edge XANES spectra of a mixture of (a) Zn in buffer, (b) Zn + 5 equiv. of PTA, (c) Zn(A $\beta_{16}$ ) + 5 equiv. of PTA, d) Zn(A $\beta_{16}$ ). Conditions: [Zn(II)] = 0.9 mM, [A $\beta_{16}$ ] = 1 mM, [PTA] = 5 mM, [HEPES] = 50 mM, pH 7.4, glycerol 10% v/v was used as a cryoprotectant. T = 20 K.

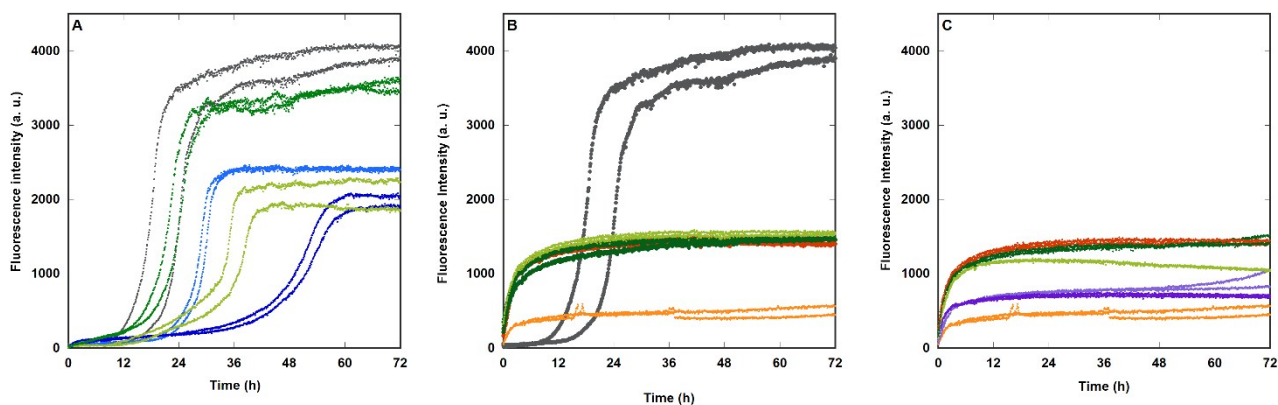

**Figure S2.** ThT- fluorescence spectra as a function of time of the aggregation of  $A\beta_{40}$ , in presence of **(A)** Cu(II), **(B)** Zn(II) and **(C)** Cu(II) + Zn(II); and the effect of adding 5 or 20 equivalents of PTA.  $[Cu(II)] = 10$  or  $18 \mu M$ ,  $[A\beta_{40}] = 20 \mu M$ ,  $[Zn(II)] = 10$  or  $18 \mu M$ ,  $[PTA] = 100$  or  $400 \mu M$ ,  $[ThT] = 10 \mu M$ ,  $[NaCl] = 100$  mM,  $[EDTA] = 0.1 \mu M$ ,  $[HEPES] = 50$  mM, pH 7.4,  $T = 37^\circ C$ . Colour code of curves: **(A)** a) grey, apo- $A\beta$ ; b) light blue,  $Cu(A\beta)$  at ratio 0.5:1; c) blue,  $Cu(A\beta)$  at ratio 0.9:1; d) light green,  $Cu(A\beta)$  at ratio 0.9:1 + 5 equiv. of PTA; e) green,  $Cu(A\beta)$  at ratio 0.9:1 + 20 equiv. of PTA; **(B)** a) grey, apo- $A\beta$ ; f) light orange,  $Zn(A\beta)$  at ratio 0.5:1; g) orange,  $Zn(A\beta)$  at ratio 0.9:1; h) light green,  $Zn(A\beta)$  at ratio 0.9:1 + 5 equiv. PTA; i) green,  $Zn(A\beta)$  at ratio 0.9:1 + 20 equiv. PTA; **(C)** f) light orange,  $Zn(A\beta)$  at ratio 0.5:1; g) orange,  $Zn(A\beta)$  at ratio 0.9:1; j) violet,  $Cu,Zn(A\beta)$  at ratio 0.5:0.5:1; k) purple,  $Cu,Zn(A\beta)$  at ratio 0.9:0.9:1; l) light green,  $Cu,Zn(A\beta)$  at ratio 0.9:0.9:1 + 5 equiv. PTA; m) green,  $Cu,Zn(A\beta)$  at ratio 0.9:0.9:1 + 20 equiv. PTA.

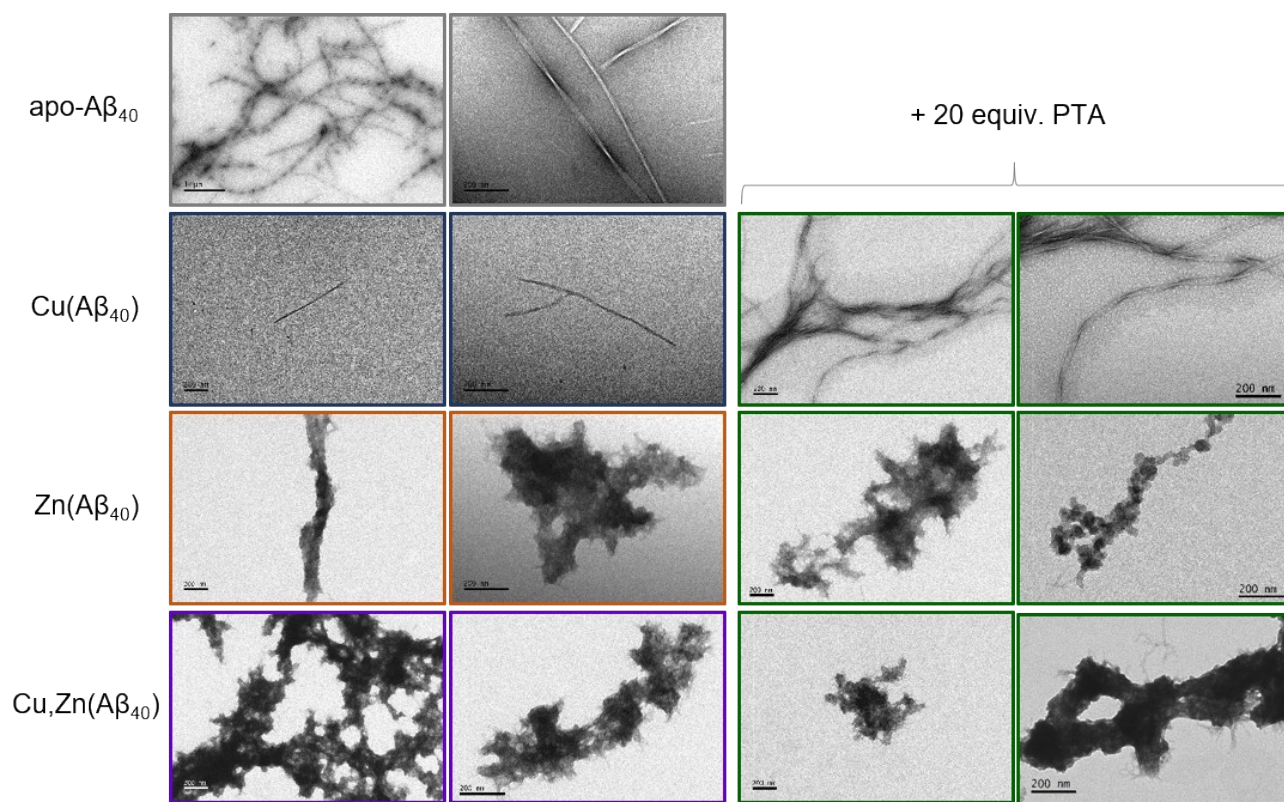

**Figure S3.** TEM images corresponding to curves (a) apo-Aβ<sub>40</sub>, (c) Cu(Aβ<sub>40</sub>) formed at 0.9 equivalents of Cu(II), (e) Cu(Aβ<sub>40</sub>) + 20 equiv. of PTA, (g) Zn(Aβ<sub>40</sub>) formed at 0.9 equivalents of Zn(II), (i) Zn(Aβ<sub>40</sub>) + 0.9 equiv. of PTA, (k) Cu,Zn(Aβ<sub>40</sub>) formed at 0.9 equivalents of Cu(II) and Zn(II), (m) Cu,Zn(Aβ<sub>40</sub>) + 20 equiv. of PTA. Samples were taken at t = 72 h, at two different zoom: 4k and 12 k (scale bar = 200 nm).
